# Supplementary material for: Pharmacokinetics of Miltefosine in Children and Adults with Cutaneous Leishmaniasis
Source: PubMed Central journal article supplement (PMC5328512; doi:10.1128/aac.02198-16), 2017-02-23
Supplement: AAC.02198-16_zac003175929s1.pdf [file AAC.02198-16_zac003175929s1.pdf]

Supplementary table 1. Compliance with protocol visits

| Day of visit | Planned time window | Visit attendance (n) | Observed time window median (IQR) | Comments                                                                                                         |
|--------------|---------------------|----------------------|-----------------------------------|------------------------------------------------------------------------------------------------------------------|
| 0            | 0                   | 60                   | 0 (0 – 0)                         |                                                                                                                  |
| 1            | 0                   | 60                   | 1 (1 – 1)                         |                                                                                                                  |
| 15           | ± 7                 | 59                   | 15 (14 – 16)                      | One participant presented outside of sampling window (at day 25)                                                 |
| 29           | 0                   | 59                   | 29 (29 – 29)                      | Six patients from Tumaco presented outside the sampling window (at days 30-32). One patient presented at day 28. |
| 60           | ± 7                 | 58                   | 57 (56 – 58)                      | Two participants presented outside sampling window (at day 67)                                                   |
| 90           | ± 7                 | 59                   | 87 (86 – 89)                      | Three patients presented outside sampling window (at days 98, 103 and 106)                                       |
| 120          | ± 7                 | 53                   | 117 (116 – 120)                   | One participant presented outside sampling window (at day 134)                                                   |
| 210          | ± 7                 | 56                   | 208 (206 – 210)                   | Seven participants presented outside sampling window (at days 222 – 243, one at day 287)                         |
